# Supplementary material for: Labyrinthine transport of hydrocarbons through grafted laminar CdTe nanosheet membranes
Source: Royal Society of Chemistry journal article supplement (doi:10.1039/c9ta07370a), 2019-01-01
Supplement: c9ta07370a1.pdf [file c9ta07370a1.pdf]

**Supplementary information**

**Labyrinthine transport of hydrocarbons through the grafted laminar CdTe nanosheet membranes.**

Dmitrii Petukhov<sup>a,b</sup>, Ilia Sadilov<sup>\*a</sup>, Roman Vasiliev<sup>a,b</sup>, Larisa Kozina<sup>b</sup>, Andrei Eliseev<sup>a</sup>

<sup>a</sup> - Department of Materials Science, Lomonosov Moscow State University, Moscow 119991 Leninskie gory 1-73, Russia

<sup>b</sup> - Department of Chemistry, Lomonosov Moscow State University, Moscow 119991 Leninskie gory 1-3, Russia

**Corresponding author** Ilia Sadilov, e-mail: [ilsadilov@yandex.ru](mailto:ilsadilov@yandex.ru)

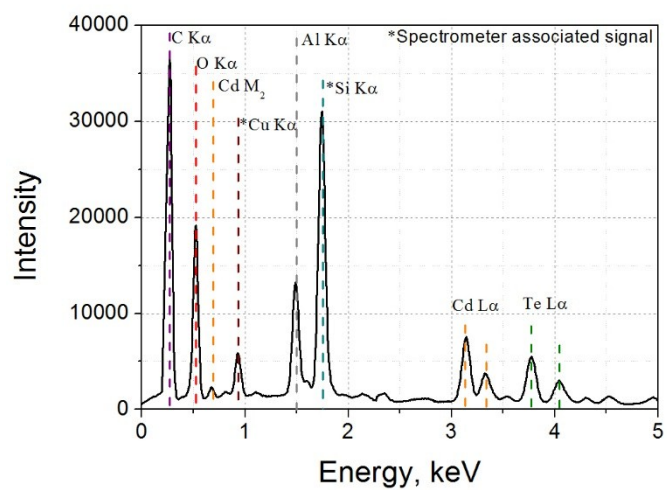

| Element | Line Type | At. % | At. % Sigma |
|---------|-----------|-------|-------------|
| C       | K series  | 66.99 | 0.22        |
| O       | K series  | 19.48 | 0.15        |
| Al      | K series  | 4.13  | 0.02        |
| Cd      | L series  | 5.14  | 0.02        |
| Te      | L series  | 4.27  | 0.02        |

SI 1: Results of CdTe nanosheets EDX characterization

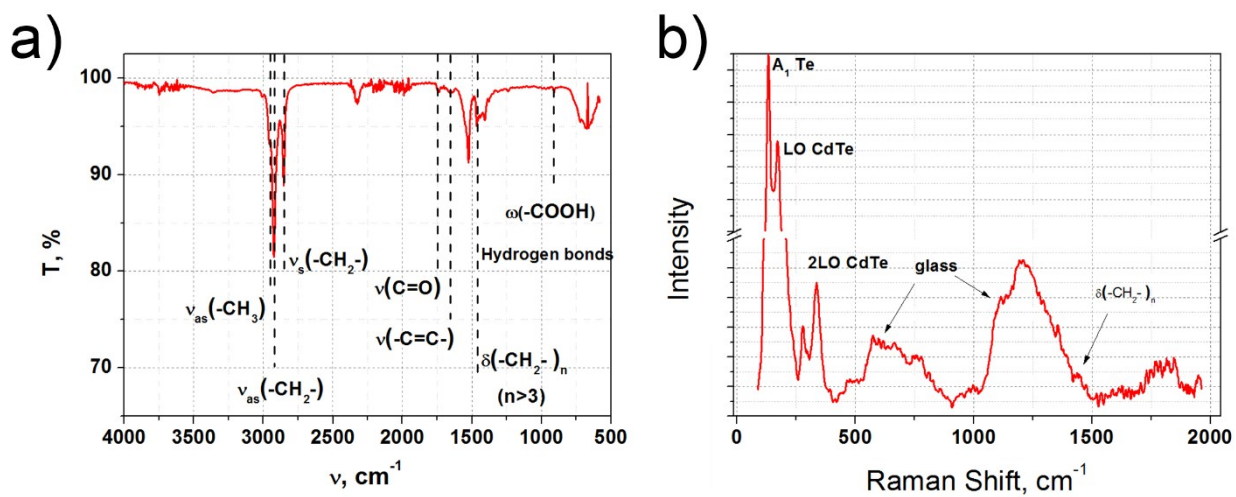

SI 2. Results of CdTe nanosheets characterization with IR (a) and Raman spectroscopy (b)

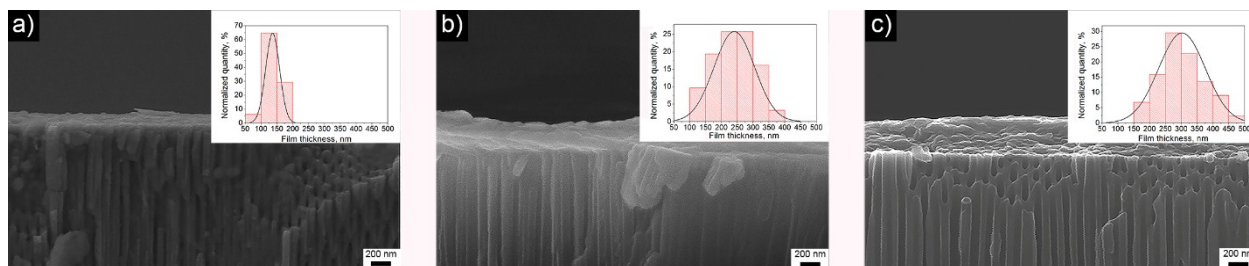

SI 3. Cross sectional SEM micrographs of CdTe/AAO membranes

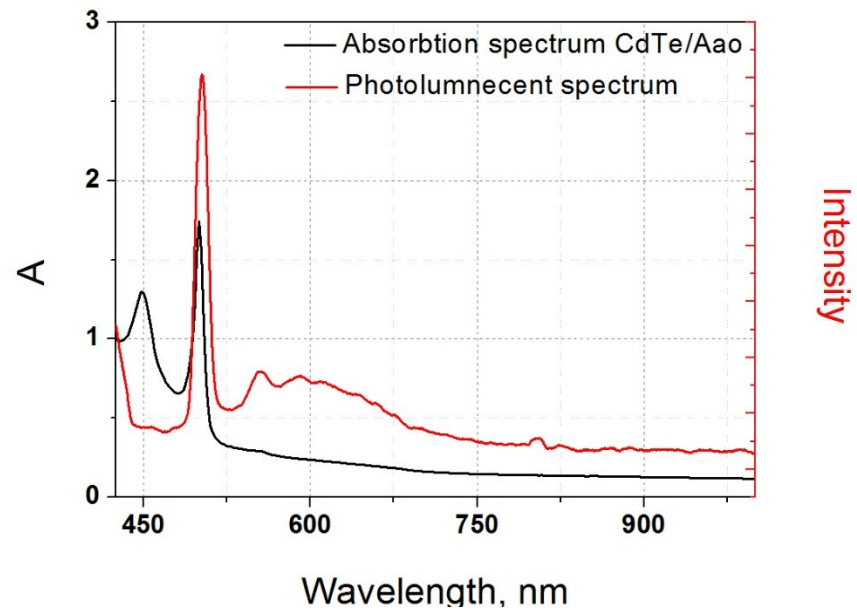

SI 4: Optical absorption and photo luminescent spectra of CdTe nanosheets.

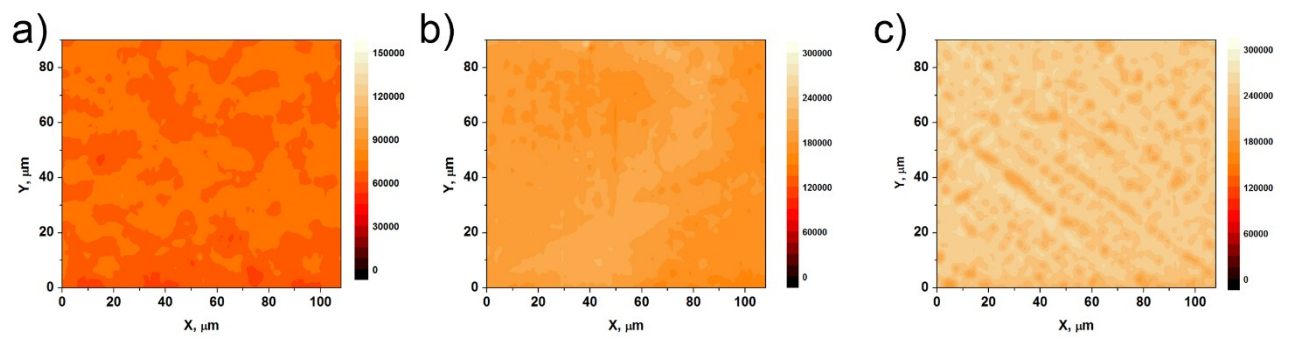

SI 5. Results of photo luminescent mapping of membranes selective layer (a) CdTe/AAO40V, (b) CdTe/AAO80V, (c) CdTe/AAO120V.

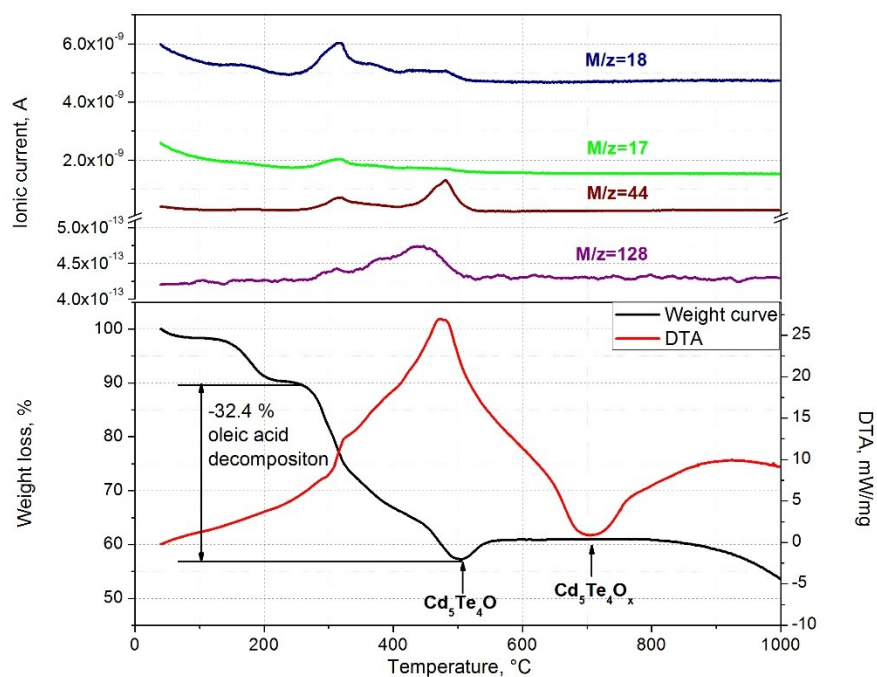

SI6: Thermal analysis results and MS-signal for mass number 18, 17 ( $\text{H}_2\text{O}$ ), 44 ( $\text{CO}_2$ ) and 128 (Te) for CdTe nanoflakes. This experiment was performed in air by heating to 1000 °C at 5 °C/min heating rate.

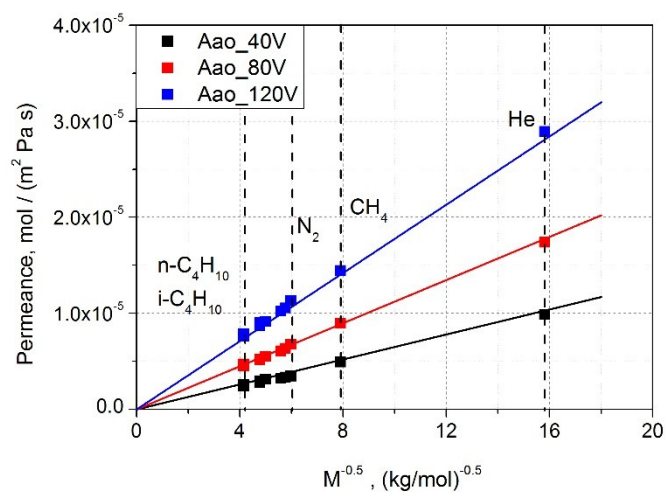

SI7. Permeance of initial AAO supports vs inverse square root of gas molecular weight. All measurements were performed at 25°C.



#### SI 8. Calculation of selective layer permeance

Permeance ( $F$ ) of asymmetric membrane depends both on permeance of selective ( $F_{selective}$ ) and supporting layer ( $F_{supporting}$ ) according to following equation <sup>7</sup>:

$$\frac{1}{F} = \frac{1}{F_{selective}} + \frac{1}{F_{supporting}} \quad (8.1)$$

Taking into account permeance of AAO support the permeance of selective layer can be calculated as:

$$F_{selective} = \frac{1}{\frac{1}{F} - \frac{1}{F_{supporting}}} \quad (8.2)$$

Permeability of selective layer can be calculated taking into account thickness of selective layer:

$$P_{selective} = F_{selective} \cdot l \quad (8.3)$$

SI 9: Derivable diffusion coefficients for different gases in grafted Vycor glasses <sup>1</sup> and grafted AAO membranes <sup>2</sup>, taking into account sorption coefficients measured in the current work and the thickness of membrane given in <sup>1,2</sup>.

| Gas                              | Grafted Vycor glass membrane                                                                         |                                         | Grafted AAO membrane                                                                                 |                                         |
|----------------------------------|------------------------------------------------------------------------------------------------------|-----------------------------------------|------------------------------------------------------------------------------------------------------|-----------------------------------------|
|                                  | Permeability $\times 10^{12}$ ,<br>$\text{mol}\cdot\text{m}/(\text{m}^2\cdot\text{Pa}\cdot\text{s})$ | $D \times 10^9$ , $\text{m}^2/\text{s}$ | Permeability $\times 10^{12}$ ,<br>$\text{mol}\cdot\text{m}/(\text{m}^2\cdot\text{Pa}\cdot\text{s})$ | $D \times 10^9$ , $\text{m}^2/\text{s}$ |
| N <sub>2</sub>                   | 4.7                                                                                                  | 7.0                                     | 0.04                                                                                                 | 0.57                                    |
| O <sub>2</sub>                   |                                                                                                      |                                         | 0.08                                                                                                 | 1.07                                    |
| CH <sub>4</sub>                  |                                                                                                      |                                         | 0.12                                                                                                 | 0.82                                    |
| C <sub>2</sub> H <sub>6</sub>    | 35                                                                                                   | 13.9                                    | 0.20                                                                                                 | 0.81                                    |
| CO <sub>2</sub>                  | 38                                                                                                   | 42.5                                    | 0.43                                                                                                 | 4.78                                    |
| C <sub>3</sub> H <sub>8</sub>    |                                                                                                      |                                         | 0.97                                                                                                 | 2.02                                    |
| i-C <sub>4</sub> H <sub>10</sub> | 105                                                                                                  | 13.7                                    | 1.26                                                                                                 | 1.65                                    |
| n-C <sub>4</sub> H <sub>10</sub> | 241                                                                                                  | 20.7                                    | 2.33                                                                                                 | 2.00                                    |

# SI 10: Theoretical calculation of liquid butane permeance in CdTe nanosheets layer

Liquid flux through the slit-like pore can be calculated using Poiseuille equation:

$$J = \frac{h^3}{12\mu} \cdot \frac{dP}{L} \quad (8.1)$$

where  $h$  – thickness of oleic acid layer available for diffusion (2.1 nm),  $\mu$  – condensate viscosity,  $dP$  – pressure difference,  $L$  – diffusion length.

Diffusion length, concerning labyrinthine flow of condensate can be calculated as:

$$L = \frac{L_{av}}{4} \cdot \frac{l}{d_{int}} \quad (8.2)$$

where  $L_{av}$  – average lateral size of CdTe nanosheet (260 nm),  $d_{int}$  – interflake distance equal to 3.4 nm and  $l$  – selective layer thickness.

To obtain value of membrane permeance the equation (8.1) should be normalized to  $dP$ , available area for liquid flow ( $A$ ) and multiplied on the total width of slits:

$$P = \frac{h^3}{12\mu} \cdot \frac{4}{L_{av}} \cdot \frac{d_{int}}{l} \cdot \left( L_{av} \frac{1}{L_{av}^2} \right) \left( L_{av} h \frac{1}{L_{av}^2} \right)^{-1} = \frac{h^2 d_{int}}{3\mu \cdot L_{av} \cdot l} \quad (8.3)$$

To convert the results calculated using eq. 8.3 from liquid volume to gas volume (STP) we

should multiply the equation to factor  $\frac{\rho V_m}{M_r}$

$$P = \frac{h^2 d_{int}}{3\mu \cdot L_{av} \cdot l} \frac{\rho V_m}{M_r} \quad (8.4)$$

Calculated permeance membrane on the assumption of butane liquid flow through the membrane is equal  $7.5 \cdot 10^{-6} \text{ mol}/(\text{m}^2 \cdot \text{Pa} \cdot \text{s})$ .

SI 11: Theoretical calculation of activation energy of butane molecules hopping diffusion.

For estimation activation energy of butane diffusion, we can use the following equation describing molecules hopping diffusion:

$$J = \frac{L_{jump}}{L_{labirint}} \cdot N \cdot f_0 \cdot e^{-\frac{E_a}{kT}} \quad (9.1)$$

where  $L_{jump}$  – is an average jump length,  $L_{labirint}$  – total traveling distance of molecule in selective layer,  $f_0$  – frequency of butane molecule jump,  $N$  – number of molecules in selective layer,  $E_a$  – activation energy of diffusion.

$L_{labirint}$  can be calculated as:

$$L_{labirint} = \frac{L_{av}}{4} \cdot \frac{l}{d_{int}} \quad (9.2)$$

Number of molecules in selective layer can be estimated using sorption constant for required pressure and taking into account the volume of oleic layers:

$$N = h \cdot A \cdot \rho_{oleic} \cdot K_{sorption} \quad (9.3)$$

We unable to found the simulation of butane molecules diffusion in grafted layer, so we used the average values of molecule residence time in free volume of PDMS equal to 5 ps and the length of jump equal to 11 Å<sup>3</sup>.

The calculated values of activation energy for butane molecule jump at different feed pressure conditions are listed in the following table:

| Pressure difference,<br>bar | Membrane<br>permeance x10 <sup>7</sup> ,<br>mol/(m <sup>2</sup> ·Pa·s) | Sorption constant,<br>mmol/g(grafted) | Activation energy,<br>eV |
|-----------------------------|------------------------------------------------------------------------|---------------------------------------|--------------------------|
| 1                           | 3                                                                      | 1.3                                   | 0.32                     |
| 1.25                        | 4.8                                                                    | 1.5                                   | 0.31                     |
| 1.5                         | 7.9                                                                    | 2.0                                   | 0.30                     |
| 1.71                        | 9.7                                                                    | 3.8                                   | 0.30                     |
| 2                           | 11                                                                     | 6.9                                   | 0.31                     |
| 2.18                        | 10                                                                     | 13.5                                  | 0.31                     |

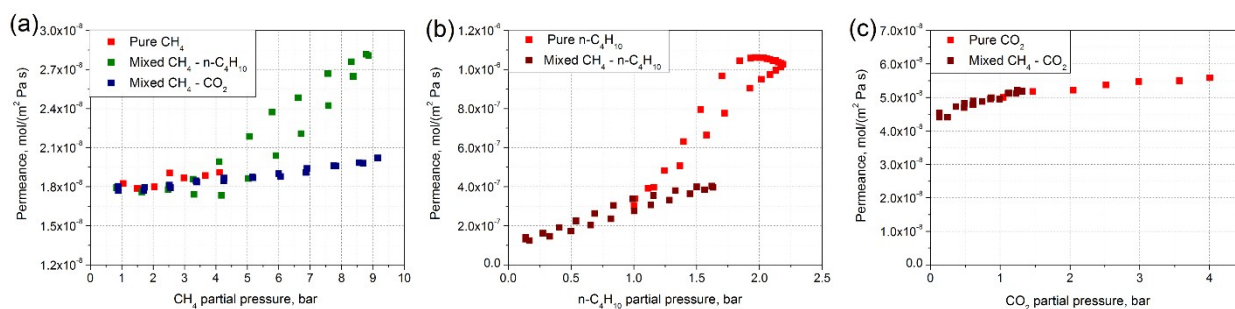

SI 12. Permeance pure and mixed gases against partial pressure for methane (a), n-butane (b), carbon dioxide (c). Feed streams containing 85.5 vol. % CH<sub>4</sub> with 14.5 vol. % n-C<sub>4</sub>H<sub>10</sub> and 87.5 vol. % CH<sub>4</sub> with 12.5 vol. % CO<sub>2</sub>. All measurements were performed at 25°C.

## References

- 1 R. P. Singh *et al*, *Ind. Eng. Chem. Res.*, 2004, **43**, 3033–3040.
- 2 I. S. Sadilov *et al*, *Sep. Purif. Technol.*, 2019, **221**, 74–82.
- 3 S. G. Charati; S. A. Stern, *Macromolecules*, 1998, **31**, 5529–5535.
